# Supplementary material for: Investigating the anti-streptococcal biofilm effect of ssDNA aptamer-silver nanoparticles complex on a titanium-based substrate
Source: Royal Society of Chemistry journal article supplement (doi:10.1039/d2ra04112j), 2022-01-01
Supplement: d2ra04112j1.pdf [file d2ra04112j1.pdf]

**Table s2.** Detail of interactions between AptBH aptamer and FBP of *S. mutans*

| Type of interaction       | Amino acid residue | Nucleotide residue | Distance (Å) |
|---------------------------|--------------------|--------------------|--------------|
| Hydrophobic Interactions  | Pro69              | G36                | 3.02         |
|                           | Phe148             | G23                | 3.76         |
|                           | Gln70              | T35                | 3.99         |
| Hydrogen bonds            | Ser71              | T12                | 3.07         |
|                           | Thr74              | T10                | 3.58         |
|                           | Lys459             | G31                | 3.88         |
|                           | Gln507             | G25                | 4.07         |
|                           | Lys514             | G31                | 3.85         |
|                           | Lys515             | G28                | 3.81         |
|                           | Asn517             | G7                 | 3.96         |
|                           | Arg530             | C5                 | 3.44         |
|                           | Gly531             | G27                | 2.99         |
|                           | Lys533             | G27                | 3.47         |
|                           | Arg536             | G25                | 3.51         |
|                           | Salt Bridges       | Lys467             | G25          |
| Glu512                    |                    | G29                | 3.38         |
| Glu512                    |                    | G30                | 4.47         |
| $\pi$ -Cation interaction | Arg80              | T39                | 5.01         |

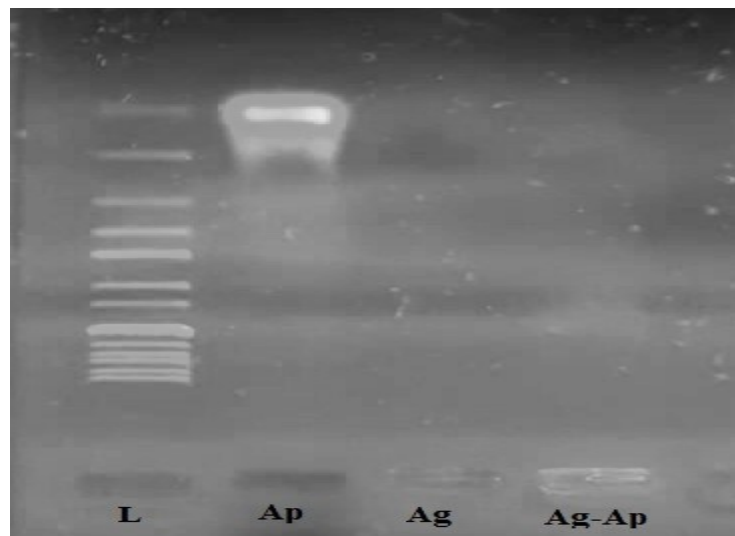

**Figure s2.** Gel retardation assay for DNA Ladder (L), AptBH aptamer (Ap), AgNPs (Ag) and AgNPs-AptBH (Ag-Ap)

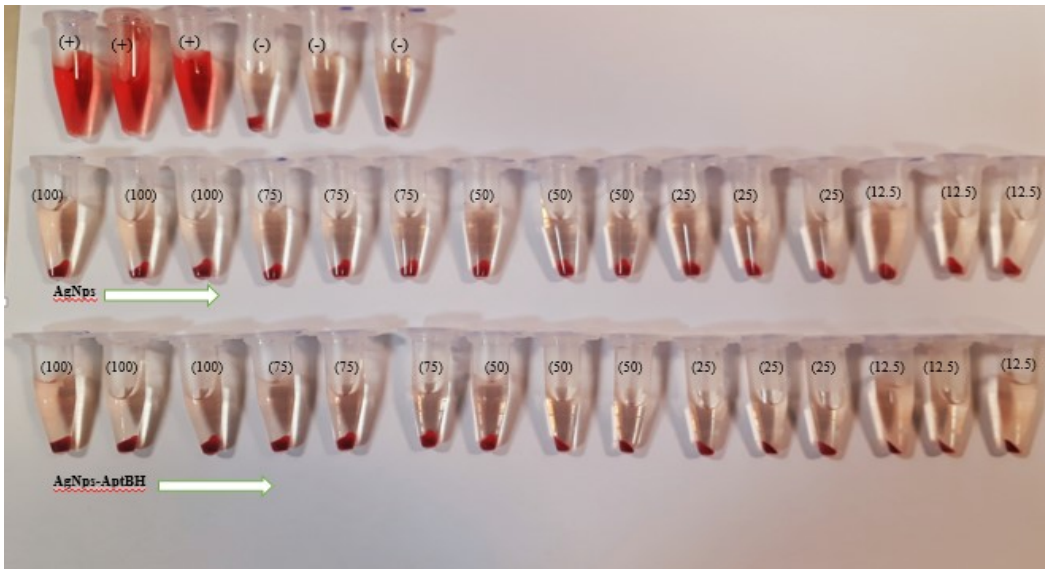

**Figure s3.** Photographs of hemolysis of RBCs. DW (+) and PBS (-) are used as the positive and negative control, respectively.
